# Supplementary material for: Typical Characterization of Commercial Camellia Oil Products Using Different Processing Techniques: Triacylglycerol Profile, Bioactive Compounds, Oxidative Stability, Antioxidant Activity and Volatile Compounds
Source: MDPI journal article supplement (doi:10.3390/foods11213489), 2022-11-03
Supplement: s1 [file s1]

**Typical characterization of commercial camellia oil products using different processing techniques: triacylglycerol profile, bioactive compounds, oxidative stability, antioxidant activity and volatile compounds**

**supplementary material**

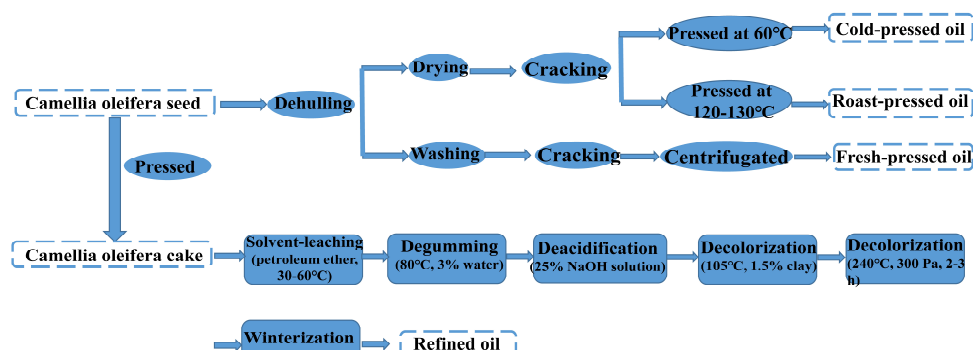

**Figure S1.** The simplified process flow sheet of four processing methods: cold-pressed, roast-pressed, fresh-pressed and refined.

**Table S1.** Fatty acid compositions of the camellia oils (%).

| Analysts | Cold-pressed              | Roast-pressed             | Refined                   | Fresh-pressed             |
|----------|---------------------------|---------------------------|---------------------------|---------------------------|
| C14:0    | 0.02 ± 0.00 <sup>a</sup>  | 0.04 ± 0.00 <sup>b</sup>  | 0.03 ± 0.01 <sup>a</sup>  | 0.01 ± 0.00 <sup>b</sup>  |
| C16:0    | 8.45 ± 0.15 <sup>a</sup>  | 8.21 ± 0.14 <sup>a</sup>  | 8.43 ± 0.17 <sup>a</sup>  | 8.27 ± 0.20 <sup>a</sup>  |
| C16:1    | 0.09 ± 0.01 <sup>ab</sup> | 0.10 ± 0.01 <sup>a</sup>  | 0.12 ± 0.02 <sup>a</sup>  | 0.11 ± 0.01 <sup>ab</sup> |
| C17:0    | 0.08 ± 0.01 <sup>c</sup>  | 0.05 ± 0.01 <sup>ab</sup> | 0.08 ± 0.00 <sup>ab</sup> | 0.07 ± 0.01 <sup>c</sup>  |
| C17:1    | 0.08 ± 0.01 <sup>a</sup>  | 0.12 ± 0.02 <sup>bc</sup> | 0.10 ± 0.01 <sup>ab</sup> | 0.06 ± 0.01 <sup>c</sup>  |
| C18:0    | 2.05 ± 0.05 <sup>ab</sup> | 2.19 ± 0.09 <sup>b</sup>  | 2.22 ± 0.03 <sup>a</sup>  | 2.26 ± 0.07 <sup>a</sup>  |
| C18:1    | 79.67 ± 0.18 <sup>a</sup> | 79.27 ± 0.49 <sup>a</sup> | 79.29 ± 0.24 <sup>a</sup> | 79.12 ± 0.35 <sup>a</sup> |
| C18:1T   | 0.03 ± 0.00 <sup>b</sup>  | 0.06 ± 0.00 <sup>c</sup>  | 0.08 ± 0.01 <sup>a</sup>  | 0.02 ± 0.00 <sup>a</sup>  |
| C18:2    | 8.45 ± 0.14 <sup>a</sup>  | 8.76 ± 0.19 <sup>a</sup>  | 8.59 ± 0.25 <sup>a</sup>  | 8.72 ± 0.19 <sup>a</sup>  |
| C18:2T   | 0.05 ± 0.01 <sup>a</sup>  | 0.04 ± 0.00 <sup>a</sup>  | 0.05 ± 0.00 <sup>a</sup>  | 0.02 ± 0.01 <sup>a</sup>  |
| C18:3    | 0.55 ± 0.08 <sup>a</sup>  | 0.59 ± 0.07 <sup>a</sup>  | 0.46 ± 0.07 <sup>a</sup>  | 0.48 ± 0.02 <sup>a</sup>  |
| C18:3T   | 0.02 ± 0.01 <sup>b</sup>  | 0.01 ± 0.00 <sup>b</sup>  | 0.04 ± 0.01 <sup>a</sup>  | 0.02 ± 0.01 <sup>b</sup>  |
| C20:0    | 0.39 ± 0.03 <sup>a</sup>  | 0.35 ± 0.03 <sup>a</sup>  | 0.36 ± 0.04 <sup>a</sup>  | 0.46 ± 0.06 <sup>a</sup>  |
| C20:1    | 0.03 ± 0.00 <sup>a</sup>  | 0.09 ± 0.01 <sup>b</sup>  | 0.08 ± 0.02 <sup>a</sup>  | 0.3 ± 0.01 <sup>a</sup>   |
| C22:0    | 0.04 ± 0.00 <sup>a</sup>  | 0.12 ± 0.02 <sup>c</sup>  | 0.07 ± 0.01 <sup>b</sup>  | 0.08 ± 0.01 <sup>b</sup>  |
| Σ SFA    | 11.03 ± 0.04 <sup>a</sup> | 10.70 ± 0.17 <sup>a</sup> | 10.91 ± 0.29 <sup>a</sup> | 11.15 ± 0.15 <sup>a</sup> |
| Σ MUFA   | 79.87 ± 0.25 <sup>a</sup> | 79.84 ± 0.06 <sup>a</sup> | 79.87 ± 0.28 <sup>a</sup> | 79.59 ± 0.26 <sup>a</sup> |
| Σ PUFA   | 9.00 ± 0.24 <sup>a</sup>  | 9.35 ± 0.2 <sup>a</sup>   | 9.05 ± 0.12 <sup>a</sup>  | 9.20 ± 0.18 <sup>a</sup>  |
| Σ TFA    | 0.10 ± 0.03 <sup>b</sup>  | 0.11 ± 0.03 <sup>b</sup>  | 0.17 ± 0.02 <sup>a</sup>  | 0.06 ± 0.02 <sup>c</sup>  |

The superscript letters indicate the statistical difference in rows in significant level at 5%.

**Table S2.** Volatile compounds of the camellia oils (mg/kg).

| Analysts                                         | Cold-pressed | Roast-pressed | Fresh-pressed | Refined   |
|--------------------------------------------------|--------------|---------------|---------------|-----------|
| 2-methyl-2-Butenoic acid ethyl ester             | -            | -             | 1.08±0.11     | -         |
| Ethyl 2-cyanocrotonate                           | -            | -             | 0.11±0.01     | -         |
| Pentan-2-methylbut-2-enoate                      | 0.15±0.02    | -             | 0.07±0.02     | -         |
| Benzoic acid ethyl ester                         | -            | -             | 2.90±0.16     | -         |
| (E)-2-methyl-2-Butenoic acid-3-methylbutyl ester | 0.31±0.01    | -             | -             | -         |
| Cyclobutanecarboxylic acid-2-methylbutyl ester   | -            | -             | 0.31±0.04     | -         |
| Benzeneacetic acid, ethyl ester                  | -            | -             | 0.42±0.01     | -         |
| 2-acetyl-4-Pentenoic acid ethyl ester            | -            | -             | -             | 0.77±0.02 |
| γ-Dodecalactone                                  | -            | 1.62±0.2      | -             | -         |
| Benzenepropanoic acid ethyl ester                | -            | -             | 0.21±0.02     | -         |
| 3-phenyl-2-Propenoic acid methyl ester           | -            | 0.96±0.15     | 0.14±0.02     | -         |
| (E)-3-phenyl-2-Propenoic acid ethyl ester        | -            | -             | 1.00±0.06     | -         |
| Ethyl N-(o-anisyl)formimidate                    | -            | 0.52±0.02     | -             | -         |
| Ethyl p-acetamidobenzoate                        | -            | 0.37±0.01     | -             | -         |
| Ethylene glycol-Adipate-Diethylene glycol        | -            | -             | 0.31±0.03     | -         |
| Tributyrin                                       | -            | -             | 0.14±0.04     | -         |
| Hexadecanoic acid methyl ester                   | 0.20±0.07    | 0.28±0.04     | 0.17±0.01     | -         |
| Dibutyl phthalate                                | -            | -             | 0.62±0.04     | -         |
| Hexadecanoic acid ethyl ester                    | 0.09±0.01    | -             | 0.64±0.1      | -         |
| (Z)-6-Octadecenoic acid methyl ester             | 0.12±0.01    | -             | -             | -         |
| (E, E)-9,12-Octadecadienoic acid, propyl ester   | 0.65±0.08    | -             | 0.4±0.02      | -         |
| (E)-9-Octadecenoic acid ethyl ester              | 1.78±0.18    | -             | 1.19±0.15     | -         |
| (Z)-9-Octadecenoic acid methyl ester             | -            | 0.27±0.07     | 0.23±0.06     | -         |
| 4-Cyclopentene-1,3-dione                         | -            | 0.63±0.1      | -             | -         |
| Acetophenone                                     | -            | -             | 0.35±0.04     | -         |
| 3-butyl-1,2,4-Cyclopentanetrione                 | -            | 0.47±0.03     | -             | -         |
| Styrene                                          | 1.71±0.02    | -             | -             | -         |
| 1,2,4-trimethyl-Benzene                          | -            | -             | 0.26±0.03     | -         |
| 8-methyl-1-Undecene                              | 0.40±0.03    | -             | -             | -         |
| Hexanoic acid                                    | 0.72±0.09    | -             | -             | -         |
| Heptanoic acid                                   | 1.79±0.09    | -             | -             | -         |
| Benzoic acid                                     | -            | 1.14±0.10     | -             | -         |
| Octanoic acid                                    | 10.08±0.26   | 10.95±0.35    | 4.30±0.20     | -         |
| 3-Methyl-2-furoic acid                           | -            | 0.38±0.06     | -             | -         |
| Nonanoic acid                                    | 9.79±0.9     | 10.18±0.32    | 4.13±0.37     | 0.10±0.02 |
| 3-Furanacetic acid                               | -            | 0.65±0.05     | -             | -         |
| 2,6-Dihydroxybenzoic acid                        | -            | -             | 0.07±0.01     | -         |
| Furfural                                         | -            | 62.61±0.73    | -             | -         |
| Benzaldehyde                                     | 2.16±0.22    | -             | 5.42±0.12     | -         |

|                                                      |            |            |           |           |
|------------------------------------------------------|------------|------------|-----------|-----------|
| (E, E)-2,4-Heptadienal                               | 2.33±0.29  | -          | -         | -         |
| 5-methyl-2-Furancarboxaldehyde                       | -          | 13.32±0.11 | -         | -         |
| Octanal                                              | 0.68±0.06  | 0.47±0.02  | 0.17±0.14 | -         |
| 1H-Pyrrole-2-carboxaldehyde                          | -          | 1.58±0.10  | -         | -         |
| (E)-2-Octenal                                        | 0.32±0.01  | -          | -         | -         |
| Benzeneacetaldehyde                                  | -          | 3.75±0.22  | 0.36±0.01 | -         |
| Nonanal                                              | 6.43±0.17  | 11.75±0.27 | 7.86±0.16 | 0.13±0.03 |
| (E)- 2-Nonenal                                       | 0.88±0.05  | -          | 0.94±0.02 | -         |
| 1-methyl-1H-Pyrrole-2-carboxaldehyde                 | -          | 2.19±0.39  | -         | -         |
| Dodecanal                                            | 0.50±0.01  | -          | -         | -         |
| (E, E)-2,4-Nonadienal                                | 1.31±0.02  | -          | -         | -         |
| (E)-2-Decenal                                        | 7.55±0.44  | 13.40±0.26 | 9.09±0.22 | 0.32±0.04 |
| (E, Z)-2,4-Decadienal                                | 2.59±0.08  | -          | -         | 0.75±0.05 |
| (E, E)-2,4-Decadienal                                | -          | 2.15±0.03  | 1.50±0.04 | -         |
| 5-Acetoxymethyl-2-furaldehyde                        | -          | 0.96±0.06  | -         | -         |
| 2,4-Decadienal                                       | 10.03±0.35 | 6.46±0.07  | 2.93±0.15 | -         |
| 2-Undecenal                                          | 11.47±0.49 | 14.4±0.45  | 9.45±0.12 | 0.33±0.05 |
| 1-(2-furanyl)-Ethanone                               | -          | 2.28±0.11  | -         | -         |
| Eugenol                                              | -          | 0.24±0.03  | -         | -         |
| (E)-2-Dodecen-1-ol trifluoroacetate                  | -          | 1.47±0.03  | -         | -         |
| 5-butyl-2,3-dimethyl-Pyrazine                        | -          | -          | 0.38±0.02 | -         |
| 1-(1H-pyrrol-2-yl)-Ethanone                          | -          | 10.59±0.52 | -         | -         |
| Anethole                                             | 0.95±0.07  | -          | -         | -         |
| Cirsiumaldehyde                                      | -          | -          | 2.16±0.18 | -         |
| 3,4-dihydro-8-hydroxy-3-methyl-1H-2-Benzopyran-1-one | -          | 0.52±0.07  | 0.05±0.01 | -         |
| 3-Methyl-5-nitrosotropone                            | -          | 0.12±0.00  | -         | -         |
